# Supplementary material for: High-performance asymmetric supercapacitor based on CdCO3/CdO/Co3O4composite supported on Ni foam
Source: Royal Society of Chemistry journal article supplement (doi:10.1039/d1ra05243h), 2021-01-01
Supplement: d1ra05243h2.pdf [file d1ra05243h2.pdf]

## Electronic Supporting Information (ESI)

### High-performance asymmetric supercapacitor based on CdCO<sub>3</sub>/CdO/Co<sub>3</sub>O<sub>4</sub> composite supported on Ni foam

Rodrigo Henríquez,\*<sup>a</sup> Alifhers S. Mestra-Acosta,<sup>a</sup> Eduardo Muñoz,<sup>a</sup> Paula Grez,<sup>a</sup> Elena Navarrete-Astorga<sup>b</sup> and Enrique A. Dalchiele<sup>c</sup>

<sup>a</sup> Instituto de Química, Facultad de Ciencias, Pontificia Universidad Católica de Valparaíso, Casilla 4059, Valparaíso, Chile.

<sup>b</sup> Universidad de Málaga, Departamento de Física Aplicada I, Laboratorio de Materiales y Superficies (Unidad asociada al CSIC), E29071 Málaga, Spain

<sup>c</sup> Instituto de Física, Facultad de Ingeniería, Herrera y Reissig 565, C. C. 30, 11000 Montevideo, Uruguay.

A single asymmetric supercapacitor was first fully discharged at 0V at a discharge current of 50 mA cm<sup>-2</sup> and then charged for 10s on a power source. It was then tested on a (Operating current 8mA and Operating voltage 0.18V- 0.6Vmin) mini fan which was in operation for a duration greater than 90s (see Video attached). **Two electrodes were also charged in series for 10s to turn on a 1 mA and 2.8V blue LED in a time of 0 to 3 min and LED red of 1.8V for 0-15 min.**

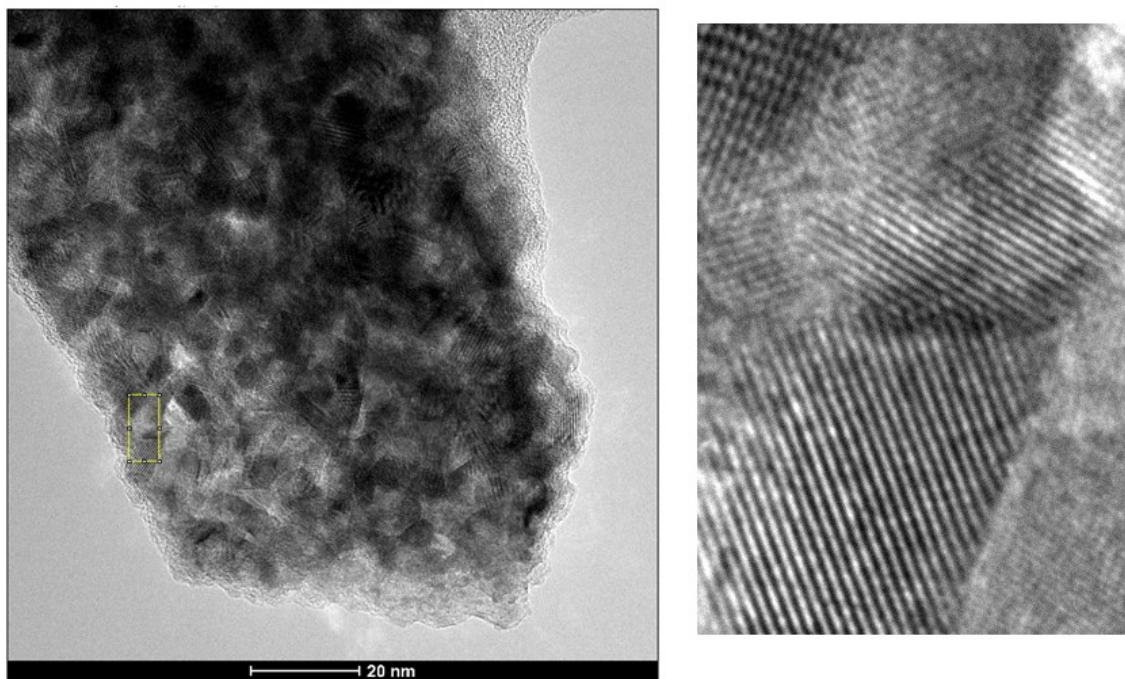

**Figure S1.** TEM images of the CdCO<sub>3</sub>/CdO/Co<sub>3</sub>O<sub>4</sub> composite after the annealing treatment under an argon atmosphere.

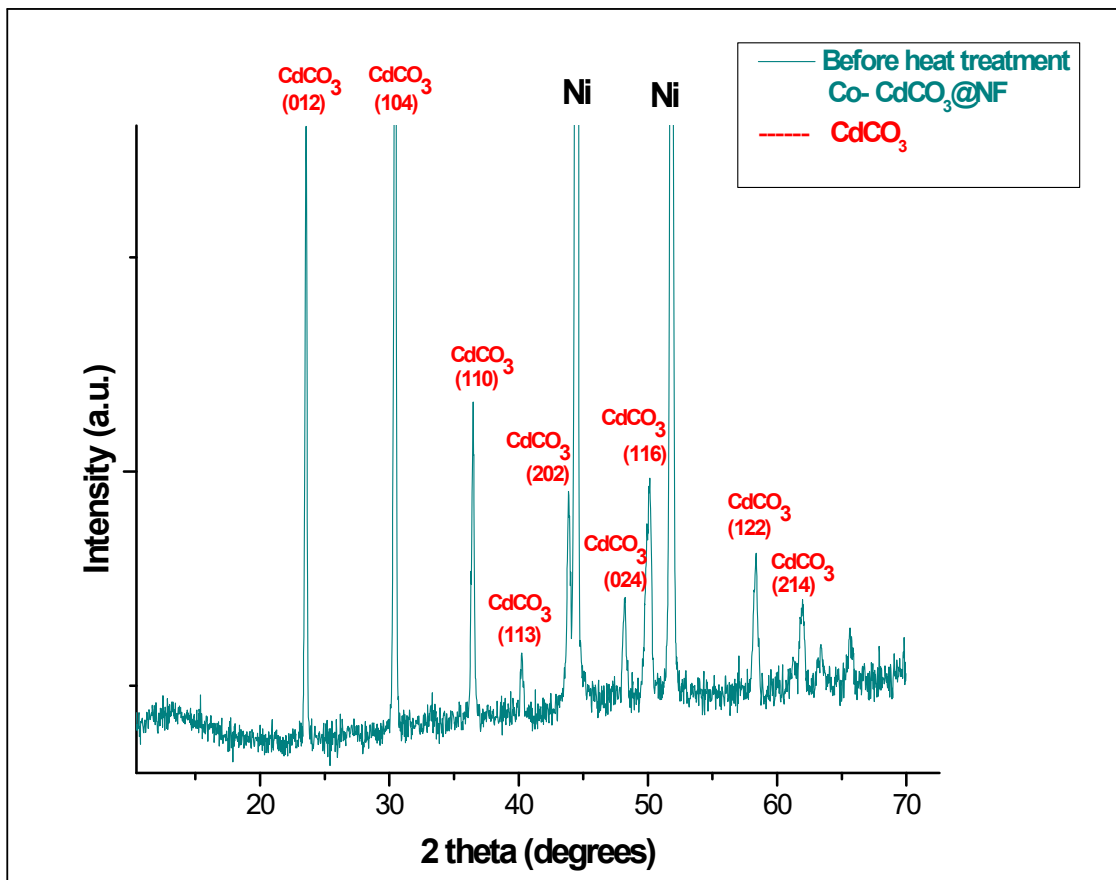

**Figure S2.** XRD diffraction pattern for a typical  $\text{CdCO}_3/\text{CdO}/\text{Co}_3\text{O}_4@\text{NF}$  sample, without the annealing process. Diffraction planes are indicated for the  $\text{CdCO}_3$  phase. (Ni, indicates the peaks originated from the nickel foam substrate).

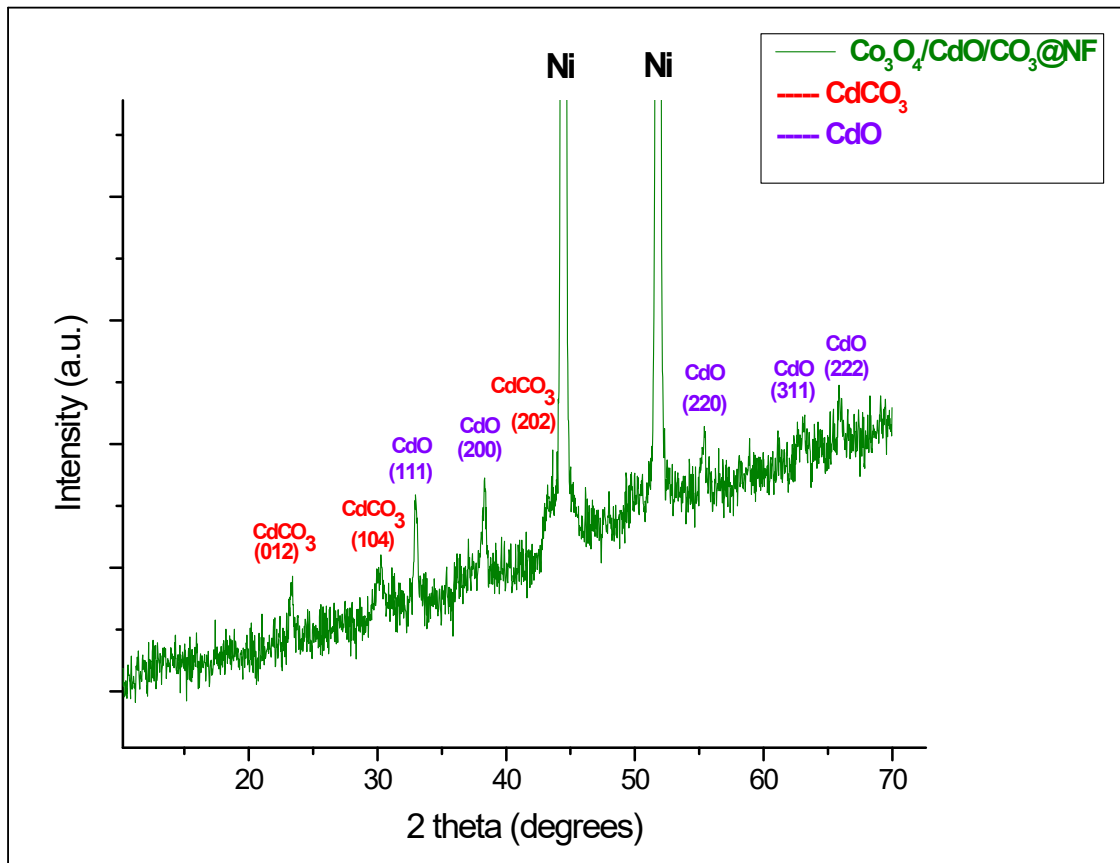

**Figure S3.** XRD diffraction pattern for a typical  $\text{CdCO}_3/\text{CdO}/\text{Co}_3\text{O}_4@\text{NF}$  electrode sample, after being submitted to the annealing process. Diffraction planes are indicated for the  $\text{CdCO}_3$  and  $\text{CdO}$  phases. (Ni, indicates the peaks originated from the nickel foam substrate).

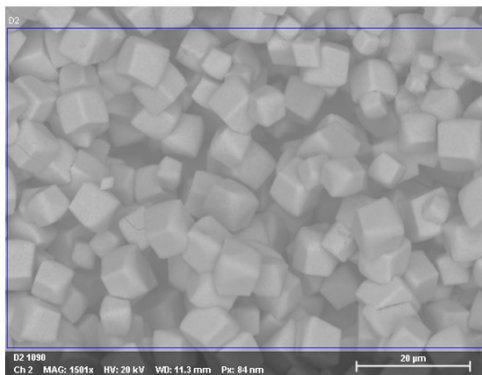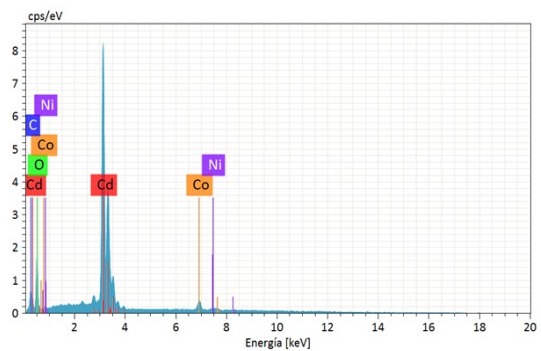

**Figure S4.** X-ray Dispersive Spectrometry (EDX) for the CdCO<sub>3</sub>/CdO/Co<sub>3</sub>O<sub>4</sub>@NF composite electrode.

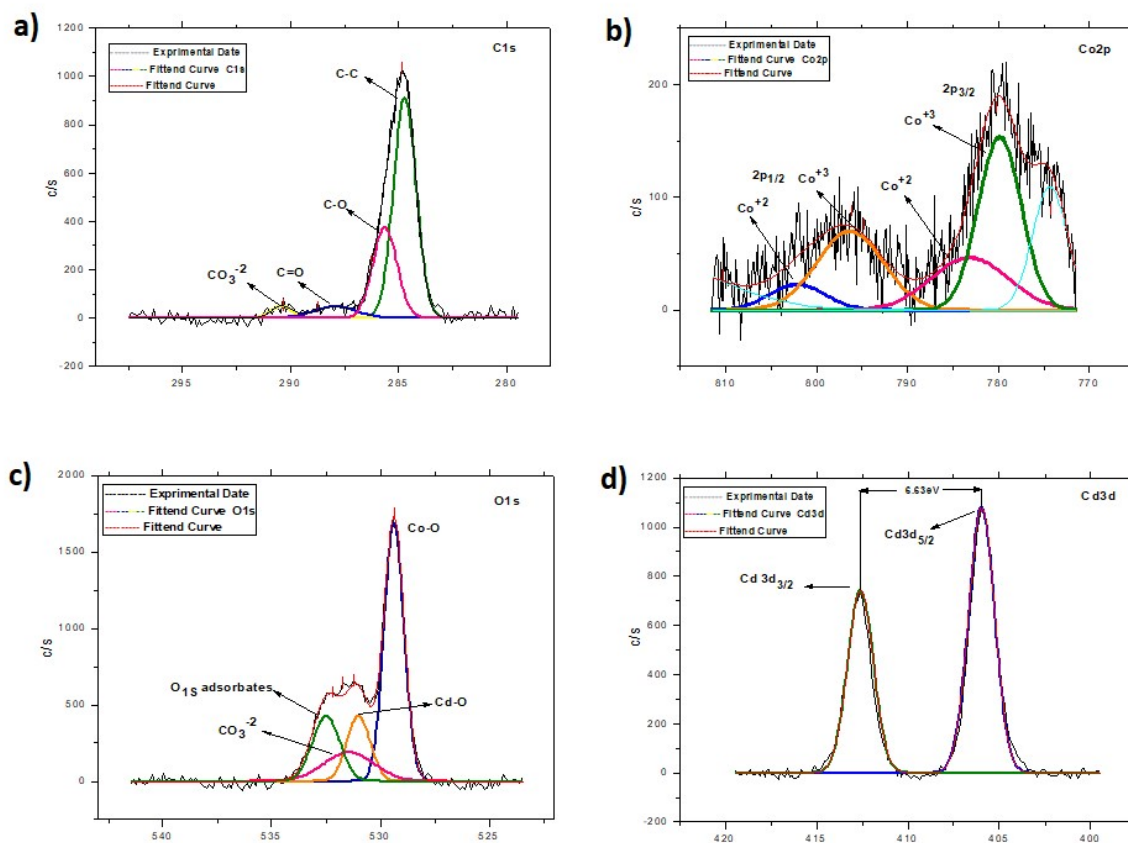

**Figure S5.** X-ray photoelectron spectroscopy analysis for the CdCO<sub>3</sub>/CdO/Co<sub>3</sub>O<sub>4</sub>@NF composite electrode.

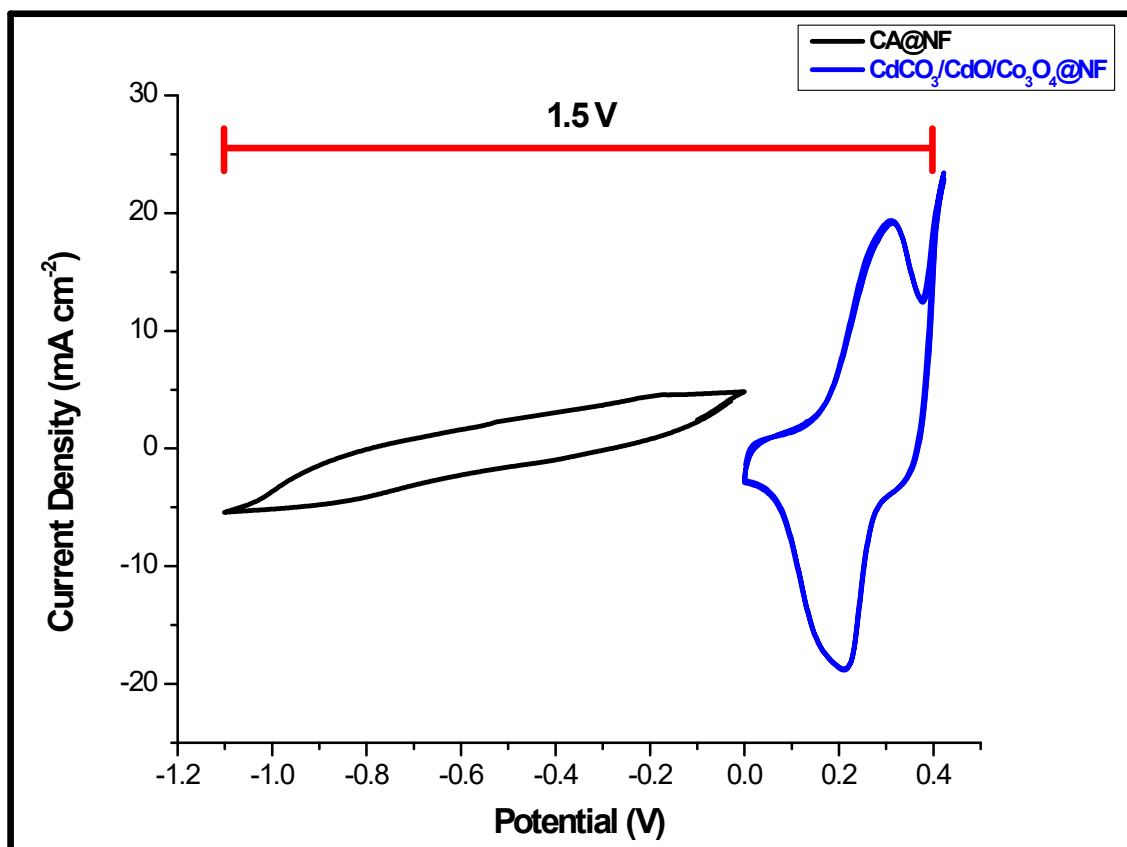

**Figure S6.** Cyclic voltammograms of the CdCO<sub>3</sub>/CdO/CO<sub>3</sub>O<sub>4</sub>@NF (blue line) and AC@NF (black line) electrodes, at a potential scan rate of 1 mVs<sup>-1</sup>.

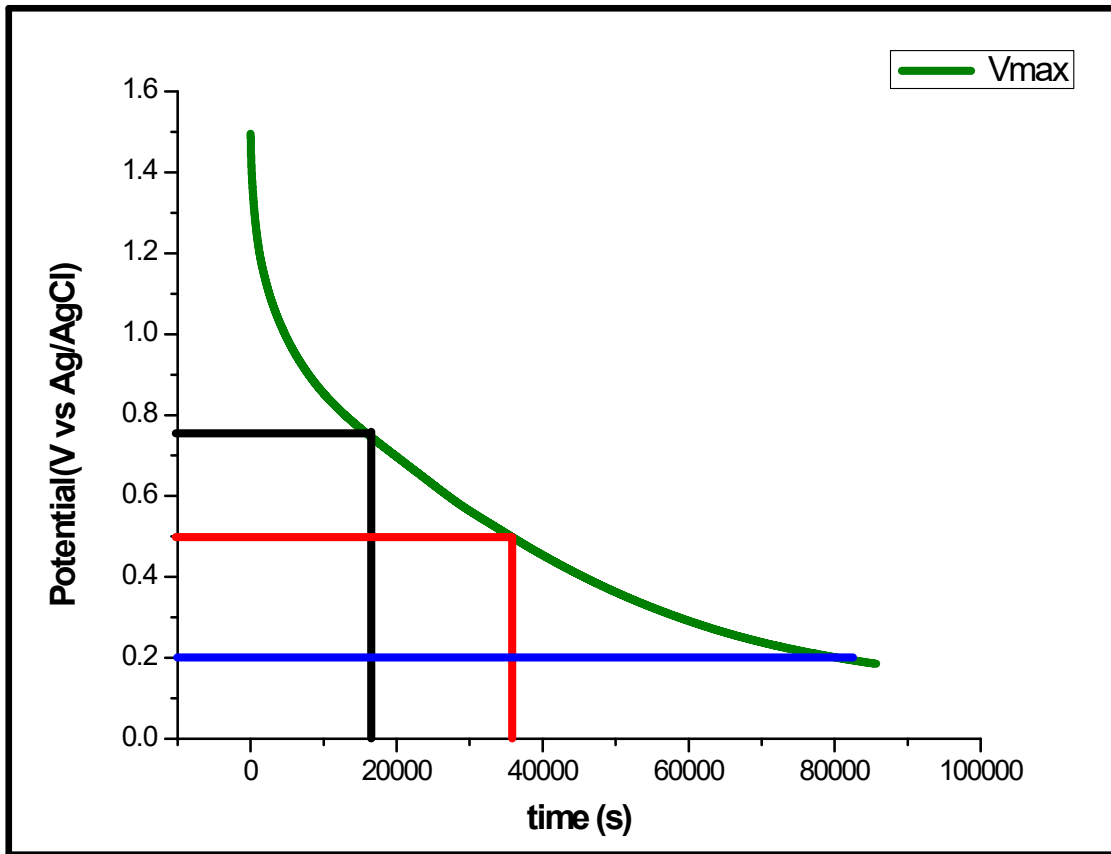

**Figure. S7.** Self-discharge curve of our supercapacitor device obtained immediately after pre-charge at  $V_{\max}$  in the previous test. This involves measuring the open circuit voltage across the supercapacitor between  $V_{\max}$  and  $1/2 V_{\max}$  compared to the course of time. The result shows that our supercapacitor self-discharges from 1.5 V ( $V_{\max}$ ) to 0.75 V ( $1/2 V_{\max}$ ) in a prolonged time of 5h. The red line shows that the supercapacitor takes 10 hours to discharge to a voltage of 0.6V and the blue line indicates that after 24 hours the supercapacitor still has a small potential of 0.2V.



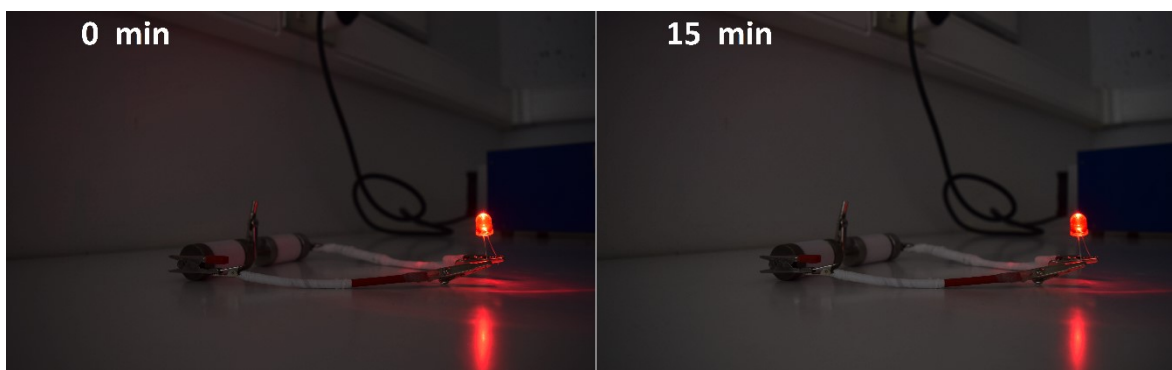

**Figures S8.** Red LED, operated by two as assembled supercapacitors in series at two different times after the charging step.

**Table S1.** Percentage of Cadmium, Oxygen, Cobalt, Carbon and Nickel obtained through the EDS analysis.

| Element | At No | Netto  | Mas [%] | Mass Norm [%] | Atom [%] |
|---------|-------|--------|---------|---------------|----------|
| Cd      | 48    | 45125  | 75.63   | 70.89         | 27.15    |
| O       | 8     | 3271   | 23.00   | 21.56         | 58.00    |
| Co      | 27    | 1378   | 3.62    | 3.39          | 2.48     |
| C       | 6     | 1029   | 3.49    | 3.27          | 11.72    |
| Ni      | 28    | 365    | 0.95    | 0.89          | 0.65     |
|         | Sum   | 106.69 | 100.00  | 100.00        |          |

**Table S2.** Specific capacitance of the asymmetric hybrid supercapacitor at different potential scan rates.

| <b>V(mVs<sup>-1</sup>)</b> | <b>Q(A.s)</b> | <b>E(V)</b> | <b>m(g)</b> | <b>C(Fg<sup>-1</sup>)</b> |
|----------------------------|---------------|-------------|-------------|---------------------------|
| 5                          | 1.70          | 1.5         | 0.023       | 24.66                     |
| 10                         | 1.45          | 1.5         | 0.023       | 21.10                     |
| 20                         | 1.17          | 1.5         | 0.023       | 17.08                     |
| 30                         | 1.01          | 1.5         | 0.023       | 14.73                     |
| 50                         | 0.81          | 1.5         | 0.023       | 11.86                     |

**Table S3.** Specific capacitance, energy density and power densities of the asymmetric hybrid supercapacitor at different current densities.

| <b>Chage/ Discharge<br/>Current (mA cm<sup>-2</sup>)</b> | <b>1</b> | <b>2</b> | <b>5</b> | <b>10</b> | <b>30</b> | <b>50</b> |
|----------------------------------------------------------|----------|----------|----------|-----------|-----------|-----------|
| Specific Capacitance (Fg <sup>-1</sup> )                 | 84.14    | 81.45    | 30.60    | 26.14     | 15.68     | 11.36     |
| Energy Density (Wh kg <sup>-1</sup> )                    | 26.29    | 23.73    | 9.56     | 8.17      | 4.9       | 3.16      |
| Power Density (W kg <sup>-1</sup> )                      | 51       | 95.68    | 255.88   | 511.42    | 1536      | 2289.65   |
